# Supplementary material
Source: publisher figshare collection journal article supplement (https://frontiersin.figshare.com/ndownloader/files/20149694)
Supplement: Supplementary file 1 [file 20149694]

## Sheet: Sheet1
			Table 6_v1. Parameters of dynamic resistances from one illuminated I-V curve
	Layers	RD (Ohm)	Layers	Rd (Ohm)	Layers	Rd (Ohm)	Layers	Rd (KOhm)	Layers	Rd (Ohm)
	1	48.4	1	795	1	908.4	1	9.7	1	815.6
	2	43.2	2	896	2	283.4	2	13.2	2	65.51
	3	27.38	3	2140	3	204.5	3	18.9	1900-01-03	24.65
	4	44.76	4	3860	4	444.9	4	11.8	4	190.7
	5	67.7	5	2190	5	780.1	5	7.09	5	566.7
